# Supplementary material for: Sex and Race Differences in the Evaluation and Treatment of Young Adults Presenting to the Emergency Department With Chest Pain
Source: PubMed Central journal article supplement — J Am Heart Assoc. 2022 May 4;11(10):e024199. doi: 10.1161/JAHA.121.024199 (PMC9238573; doi:10.1161/jaha.121.024199), 2022-05-04
Supplement: JAH3-11-e024199-s001.pdf [file JAH3-11-e024199-s001.pdf]

# **Supplemental Material**

**Table S1. Cerner Multum’s therapeutic classification categories used to define medication administration, most specific.**

| <b>Medication category</b>        | <b>Therapeutic classification</b>                                                                                                        |
|-----------------------------------|------------------------------------------------------------------------------------------------------------------------------------------|
| <b>Anti-platelets</b>             | Category 3: 062 – Salicylates<br>OR<br>Category level 3: 211 – platelet aggregation inhibitors                                           |
| <b>Anti-anginal</b>               | Category level 2: 045 – antianginal agents<br>OR<br>Category level 2: 053 - vasodilators                                                 |
| <b>Gastroenterological agents</b> | Category level 2: 272 - proton pump inhibitors<br>OR<br>Category level 2: 094 - H2 antagonists<br>OR<br>Category level 2: 088 - antacids |
| <b>Narcotic analgesics</b>        | Category level 2: 060 – narcotic analgesics                                                                                              |
| <b>Benzodiazepines</b>            | Category level 2: 067 – benzodiazepines                                                                                                  |
| <b>NSAIDs</b>                     | Category Level 3: 061 – Non-steroidal anti-inflammatory agents                                                                           |

**Table S2. ICD-10 code and corresponding CCS codes used for identification of diagnoses of interest.**

| <b>Diagnosis</b>                                                                                                                                                  | <b>ICD-10 code</b>                                                                                                  | <b>ICD-9 code</b>                                                                                                                                                                                                                                                                                                                                                                                                                                                                                                                                                                                | <b>CCS code</b> |
|-------------------------------------------------------------------------------------------------------------------------------------------------------------------|---------------------------------------------------------------------------------------------------------------------|--------------------------------------------------------------------------------------------------------------------------------------------------------------------------------------------------------------------------------------------------------------------------------------------------------------------------------------------------------------------------------------------------------------------------------------------------------------------------------------------------------------------------------------------------------------------------------------------------|-----------------|
| <b>Acute myocardial infarction</b>                                                                                                                                | I210-I2229                                                                                                          | 4100, 41000, 41001, 41002, 4101, 41010, 41011, 41012, 4102, 41020, 41021, 41022, 4103, 41030, 41031, 41032, 4104, 41040, 41041, 41042, 4105, 41050, 41051, 41052, 4106, 41060, 41061, 41062, 4107, 41070, 41071, 41072, 4108, 41080, 41081, 41082, 4109, 41090, 41091, 41092                                                                                                                                                                                                                                                                                                                     | 100             |
| <b>Coronary atherosclerosis and other heart disease</b>                                                                                                           | I20-I209, I240, I248-I249, I2510-I252, I255-I259                                                                    | 4110, 4111, 4118, 41181, 41189, 412, 4130, 4131, 4139, 4140, 41400, 41401, 41406, 4142, 4143, 4144, 4148, 4149, V4581, V4582                                                                                                                                                                                                                                                                                                                                                                                                                                                                     | 101             |
| <b>Arrythmia</b>                                                                                                                                                  | I470-I4892, I491-I499                                                                                               | 4270, 4271, 4272, 42731, 42732, 42760, 42761, 42769, 42781, 42789, 4279, 7850, 7851                                                                                                                                                                                                                                                                                                                                                                                                                                                                                                              | 106             |
| <b>Essential hypertension, hypertension with complications and secondary hypertension, and hypertension complication pregnancy, childbirth and the puerperium</b> | I10-I110, I119-I130, I1310-I32, I1150-I169, O10111-O169, H35037-H35033, I674, I973                                  | 4011, 4019, 4010, 40200, 40201, 40210, 40211, 40290, 40291, 4030, 40300, 40301, 4031, 40310, 40311, 4039, 40390, 40391, 4040, 40400, 40401, 40402, 40403, 4041, 40410, 40411, 40412, 40413, 4049, 40490, 40491, 40492, 40493, 40501, 40509, 40511, 40519, 40591, 40599, 4372, 64200, 64201, 64202, 64203, 64204, 64210, 64211, 64212, 64213, 64214, 64220, 64221, 64222, 64223, 64224, 64230, 64231, 64232, 64233, 664240, 64241, 64242, 64243, 64244, 64250, 64251, 64252, 64253, 64254, 64260, 64261, 64262, 64263, 64264, 64270, 64271, 64272, 64273, 6427, 64290, 64291, 64292, 64293, 64294 | 98, 99, 183     |
| <b>Congestive heart failure, non-hypertensive</b>                                                                                                                 | I0981, I110, I130, I501-I509, I97130, I97131, O29121-O29129, Z95811, Z95812                                         | 39891, 4280, 4281, 42820, 42821, 42822, 42823, 42830, 42831, 42832, 42833, 42840, 42841, 42842, 42843, 4289                                                                                                                                                                                                                                                                                                                                                                                                                                                                                      | 108             |
| <b>Peri-; endo-; and myocarditis; cardiomyopathy</b>                                                                                                              | A3681-A3950, A3952, B2682, B3320, B3322, B3324, B5881, D8685, I1012, I090, I255, I400-I43, I514, J1082, J1182, O903 | 03282, 03640, 03641, 03642, 03643, 07420, 07421, 07422, 07423, 11281, 11503, 11504, 11513, 11514, 11593, 11594, 1303, 3910, 3911, 3912, 3918, 3919, 3920, 393, 3980, 39890, 39899, 4200, 42090, 42091, 42099, 4210, 4211, 4219, 4220, 42290, 42291, 42292, 42293, 4229, 4230, 4231, 4232, 4233, 4238, 4239, 4250, 4251, 42511, 42518, 4252, 4253, 4254, 4257, 4258, 4259, 4290                                                                                                                                                                                                                   | 97              |
| <b>Non-specific chest pain</b>                                                                                                                                    | R072, R0789, R079                                                                                                   | 78650, 78651, 78659                                                                                                                                                                                                                                                                                                                                                                                                                                                                                                                                                                              | 102             |
| <b>Pulmonary heart disease</b>                                                                                                                                    | I2601-I289                                                                                                          | 4150, 4151, 41512, 41513, 41519, 4160, 4161, 4162, 4168, 4169, 4170, 4171, 4178, 4179, V1255                                                                                                                                                                                                                                                                                                                                                                                                                                                                                                     | 103             |

**Table S3. Variables considered in the LASSO regression and included in the final multivariable regression model after LASSO analyses.**

| <b>Outcome</b>                              | <b>Covariates included in LASSO</b>                                                                                                                                                                                                                                                          | <b>Covariates included in final model</b>                                                                                                                                     |
|---------------------------------------------|----------------------------------------------------------------------------------------------------------------------------------------------------------------------------------------------------------------------------------------------------------------------------------------------|-------------------------------------------------------------------------------------------------------------------------------------------------------------------------------|
| <b>Admission to hospital or observation</b> | Sex, race, age, diabetes, hypertension, hyperlipidemia, substance abuse, asthma or COPD, obesity, depression, heart failure, arrival by ambulance, expected source of payment, triage level, cardiac enzyme testing, ECG testing, any diagnostic testing, evaluation by consulting physician | Sex, race, age, diabetes, hyperlipidemia, obesity, heart failure, arrival by ambulance, triage level, ECG testing, cardiac enzyme testing, evaluation by consulting physician |
| <b>ECG testing</b>                          | Sex, race, age, diabetes, hypertension, hyperlipidemia, substance abuse, asthma or COPD, obesity, depression, heart failure, arrival by ambulance, expected source of payment, triage level, evaluation by consulting physician                                                              | Sex, age, race, hypertension, asthma or COPD, heart failure, arrival by ambulance, triage level, evaluation by consulting physician                                           |
| <b>Cardiac enzyme testing</b>               | Sex, race, age, diabetes, hypertension, hyperlipidemia, substance abuse, asthma or COPD, obesity, depression, heart failure, arrival by ambulance, expected source of payment, triage level, evaluation by consulting physician                                                              | Sex, age, race, hypertension, heart failure, triage level, evaluation by consulting physician                                                                                 |
| <b>Wait time</b>                            | Sex, race, age, diabetes, hypertension, hyperlipidemia, substance abuse, asthma or COPD, obesity, depression, heart failure, arrival by ambulance, expected source of payment, triage level, evaluation by consulting physician                                                              | Sex, age, race, obesity, arrival by ambulance, expected source of payment, triage level                                                                                       |
| <b>Emergency Triage</b>                     | Sex, race, age, diabetes, hypertension, hyperlipidemia, substance abuse, asthma or COPD, obesity, depression, heart failure, arrival by ambulance, expected source of payment                                                                                                                | Sex, age, race, depression, heart failure, arrival by ambulance                                                                                                               |

**Table S4. Characteristics of young women presenting to the ED with chest pain, by race\***

| <b>Sample size<br/>National estimate</b>                                                                | <b>White women<br/>1,514<br/>10,578,600</b> | <b>Women of color<br/>805<br/>6,302,059</b> |                |
|---------------------------------------------------------------------------------------------------------|---------------------------------------------|---------------------------------------------|----------------|
|                                                                                                         | <b>Mean ± SD</b>                            | <b>Mean ± SD</b>                            | <b>p-value</b> |
| <b>Age</b>                                                                                              | 38.2 ± 11.0 years                           | 36.6 ± 9.8 years                            | 0.003          |
| <b>Expected source of payment</b>                                                                       | <b>Percent</b>                              | <b>Percent</b>                              | 0.013          |
| Private insurance                                                                                       | 38.5% [35.4, 41.7%]                         | 26.7% [21.5, 32.5%]                         |                |
| Medicare                                                                                                | 7.5% [5.8, 9.6%]                            | 7.3% [5.2, 10.0%]                           |                |
| Medicaid or CHIP or state-based program                                                                 | 30.1% [26.9,33.5%]                          | 37.2% [31.1, 43.7%]                         |                |
| Self-pay or no charge/charity                                                                           | 10.3% [7.8, 13.4%]                          | 13.7% [9.6, 19.3%]                          |                |
| Other/Unknown                                                                                           | 13.6% [10.5, 17.4%]                         | 15.2% [10.6, 21.2%]                         |                |
| <b>Arrival by ambulance</b><br>(Estimated visits: White women: 10,186,904<br>Women of color: 6,183,416) |                                             |                                             | 0.807          |
| Yes                                                                                                     | 14.1% [12.0, 17.2%]                         | 15.1% [10.9, 20.6%]                         |                |
| No                                                                                                      | 82.2% [78.7, 85.1%]                         | 83.0% [77.4, 87.5%]                         |                |
| <b>Episode of care</b>                                                                                  |                                             |                                             |                |
| Initial visit                                                                                           | 86.0% [81.3, 89.6%]                         | 87.6% [82.2, 91.5%]                         | 0.473          |
| <b>Clinical Comorbidities</b>                                                                           |                                             |                                             |                |
| Asthma/COPD                                                                                             | 20.2% [17.5, 23.3%]                         | 22.3% [18.7, 26.3%]                         | 0.385          |
| Heart Failure                                                                                           | 3.4% [2.3, 5.1%]                            | 4.0% [2.4, 6.5%]                            | 0.644          |
| Diabetes (Type 1, type2, unspecified)                                                                   | 10.4% [8.8, 12.3%]                          | 14.5% [11.0, 18.7%]                         | 0.056          |
| Hyperlipidemia                                                                                          | 9.3% [7.6, 11.5%]                           | 8.4% [5.3, 13.2%]                           | 0.71           |
| Hypertension                                                                                            | 24.0% [21.5, 26.8%]                         | 34.7% [30.3, 39.3%]                         | <0.001         |
| Obesity                                                                                                 | 7.2% [5.4, 9.5%]                            | 11.0% [8.3, 14.5%]                          | 0.014          |
| Substance abuse                                                                                         | 6.8% [5.3, 8.7%]                            | 5.2% [3.5, 7.8%]                            | 0.192          |
| Depression                                                                                              | 17.5% [14.9, 20.5%]                         | 14.8% [11.4, 19.1%]                         | 0.21           |
| None                                                                                                    | 40.1% [36.3, 44.0%]                         | 36.4% [32.1, 40.9%]                         | 0.128          |
| <b>Vitals before triage</b>                                                                             | <b>Mean ± SD**</b>                          | <b>Mean ± SD**</b>                          |                |
| Heart rate                                                                                              | 87.3 ± 19.9 bpm                             | 86.7 ± 15.7 bpm                             | 0.567          |
| Respiratory rate                                                                                        | 18.8 ± 6.6 bpm                              | 18.4 ± 3.2 bpm                              | 0.1            |
| Systolic BP                                                                                             | 136.0 ± 22.6 mmHg                           | 138.0 ± 21.7 mmHg                           | 0.218          |
| Diastolic BP                                                                                            | 81.3 ± 13.8 mmHg                            | 82.7 ± 14.0 mmHg                            | 0.16           |
| Pulse Oximetry                                                                                          | 97.9 ± 3.7 %                                | 98.3 ± 3.5 %                                | 0.029          |

\* Percentages based on national estimates

\*\* Means calculated among those with values > 0 ; estimated number of ED visit for which vital signs were available: heart rate (white women: 10,124,358; women of color: 5,913,513), respiratory rate (white women: 10,021,039, women of color: 6,029,571), systolic BP (white women: 10,230,731, women of color: 6,126,387), diastolic BP (white women: 10,236,951, women of color: 6,125,976), pulse oximetry (white women: 10,138,233, women of color: 5,921,365).

**Table S5. Characteristics of young men presenting to the ED with chest pain, by race\***

|                                                                                                    | <b>White Men</b><br>1,266<br>8,787,519 | <b>Men of color</b><br>567<br>4,061,967 |                |
|----------------------------------------------------------------------------------------------------|----------------------------------------|-----------------------------------------|----------------|
|                                                                                                    | <b>Mean ± SD</b>                       | <b>Mean ± SD</b>                        | <b>p-value</b> |
| Sample size                                                                                        |                                        |                                         |                |
| National estimate                                                                                  |                                        |                                         |                |
| <b>Age</b>                                                                                         | 39.2 ± 10.8 years                      | 37.9 ± 10.4 years                       | 0.050          |
| <b>Expected source of payment</b>                                                                  | <b>Percent [95% CI]</b>                | <b>Percent [95% CI]</b>                 | 0.193          |
| Private insurance                                                                                  | 37.0% [32.6, 41.6%]                    | 28.2% [23.1, 33.9%]                     |                |
| Medicare                                                                                           | 8.8% [6.5, 12.0%]                      | 8.7% [5.4, 13.6%]                       |                |
| Medicaid or CHIP or state-based program                                                            | 24.6% [20.9, 28.6%]                    | 28.7% [23.8, 34.1%]                     |                |
| Self-pay or no charge/charity                                                                      | 15.4% [12.1, 19.2%]                    | 16.9% [12.9, 21.8%]                     |                |
| Other/Unknown                                                                                      | 14.3% [10.6, 18.9%]                    | 17.6% [12.5, 24.3%]                     |                |
| <b>Arrival by ambulance</b><br>(Estimated visits: White men: 8,566,321<br>Men of color: 3,911,390) |                                        |                                         | 0.748          |
| Yes                                                                                                | 18.8% [15.5, 22.6%]                    | 17.7% [14.0, 22.1%]                     |                |
| No                                                                                                 | 78.7% [74.8, 82.2%]                    | 78.6% [74.3, 82.4%]                     |                |
| <b>Episode of care</b>                                                                             |                                        |                                         | 0.892          |
| Initial visit                                                                                      | 88.9% [85.6, 91.5%]                    | 89.2% [83.8, 93.0%]                     |                |
| <b>Clinical Comorbidities</b>                                                                      |                                        |                                         |                |
| Asthma/COPD                                                                                        | 14.4% [11.8, 17.5%]                    | 17.2% [13.4, 21.7%]                     | 0.256          |
| CHF                                                                                                | 4.6% [3.3, 6.5%]                       | 4.4% [2.4, 8.0%]                        | 0.914          |
| Diabetes (Type 1, type2, unspecified)                                                              | 13.0% [11.1, 15.3%]                    | 14.3% [10.6, 19.0%]                     | 0.616          |
| HLD                                                                                                | 13.4% [10.7, 16.6%]                    | 7.0% [4.8, 10.1%]                       | 0.002          |
| HTN                                                                                                | 32.3% [28.9, 35.9%]                    | 35.3% [30.3, 40.6%]                     | 0.306          |
| Obesity                                                                                            | 6.2% [4.5, 8.5%]                       | 6.7% [4.3, 10.3%]                       | 0.764          |
| Substance abuse                                                                                    | 12.4% [9.5, 16.1%]                     | 9.8% [6.9, 13.9%]                       | 0.278          |
| Depression                                                                                         | 10.3% [8.5, 12.4%]                     | 4.9% [3.0, 8.0%]                        | 0.003          |
| None                                                                                               | 36.6% [32.8, 40.7%]                    | 37.7% [31.9, 43.8%]                     | 0.922          |
| <b>Vitals before triage</b>                                                                        | <b>Mean ± SD **</b>                    | <b>Mean ± SD**</b>                      | <b>p-value</b> |
| Heart rate                                                                                         | 86.5 ± 19.9 bpm                        | 84.5 ± 16.1 bpm                         | 0.064          |
| Respiratory rate                                                                                   | 18.3 ± 3.6 bpm                         | 17.9 ± 3.0 bpm                          | 0.074          |
| Systolic BP                                                                                        | 139.9 ± 20.9 mmHg                      | 140.9 ± 20.6 mmHg                       | 0.520          |
| Diastolic BP                                                                                       | 85.2 ± 13.5 mmHg                       | 85.0 ± 14.1 mmHg                        | 0.835          |
| Pulse Oximetry                                                                                     | 97.2 ± 4.4%                            | 97.2 ± 4.4 %                            | 0.977          |

\* Percentages based on national estimates

\*\* Means calculated among those with values > 0 ; estimated number of ED visit for which vital signs were available: heart rate (white men: 8,395,385; men of color: 3,783,433); respiratory rate (white men: 8,475,973; men of color: 3,882,054); systolic BP (white men: 8,561,969; men of color: 3,916,911); diastolic BP (white men: 8,559,234 men of color: 3,909,458); pulse oximetry (white men: 8,408,171, men of color: 3,873,823)

**Table S6. Triage and assessment of young women presenting to the Emergency Room with chest pain by race \***

| Sample size<br>National estimate    | White women<br>1,514<br>10,578,600 | Women of color<br>805<br>6,302,059 |                |
|-------------------------------------|------------------------------------|------------------------------------|----------------|
|                                     | Percent [95% CI]                   | Percent [95% CI]                   | p-value        |
| <b>Triage level</b>                 |                                    |                                    | 0.352          |
| Immediate/Emergent                  | 20.1% [16.5,24.3%]                 | 17.3%[12.5,23.5%]                  |                |
| Urgent                              | 38.9% [35.0,43.1%]                 | 36.5%[29.1,44.7%]                  |                |
| Semi-urgent/Non-urgent              | 13.4% [10.9,16.5%]                 | 11.8% [7.5,18.0%]                  |                |
| No triage                           | 27.5% [22.3,33.5%]                 | 34.4% [23.2,47.7%]                 |                |
| <b>Diagnostic testing</b>           |                                    |                                    |                |
| BNP                                 | 7.0% [5.2,9.4%]                    | 5.9% [4.1,8.3%]                    | 0.461          |
| Cardiac enzymes                     | 19.2% [15.8,23.2%]                 | 23.0% [16.7,30.7%]                 | 0.244          |
| D-Dimer                             | 17.9% [14.7,21.5%]                 | 14.5% [11.0,18.9%]                 | 0.211          |
| X-ray                               | 73.6% [70.1,76.8%]                 | 67.8% [61.7,73.3%]                 | 0.051          |
| ECG                                 | 76.1% [72.6,79.2%]                 | 71.0% [65.3,76.2%]                 | 0.084          |
| Cardiac Monitor                     | 27.8% [24.2,31.8%]                 | 20.1% [15.4,25.9%]                 | 0.018          |
| CT chest                            | 8.7% [7.0,10.8%]                   | 9.3% [7.0,12.3%]                   | 0.757          |
| Toxicology screen                   | 4.4% [3.0,6.3%]                    | 3.2% [2.1,4.8%]                    | 0.255          |
| No testing                          | 25.6% [69.5,77.2%]                 | 23.0% [68.8,81.6%]                 | 0.692          |
| <b>Seen by consulting physician</b> | 8.6% [6.7, 10.9%]                  | 8.4% [5.9,11.8%]                   | 0.909          |
|                                     | <b>Mean ± SD**</b>                 | <b>Mean ± SD**</b>                 | <b>p-value</b> |
| <b>Wait time to see provider</b>    | 42.7 ± 74.7 min                    | 57.8 ± 92.2 min                    | 0.0183         |

\* Percentages based on national estimates

\*\* Means calculated among those with values > 0 ; estimated number of ED visit for wait times were available: White women: 9,380,487 ; women of color: 5,325,775.

**Table S7. Triage and assessment of young men presenting to the Emergency Room with chest pain by race\***

| Sample size<br>National estimate    | <b>White Men</b><br>1,266<br>8,787,519 | <b>Men of color</b><br>567<br>4,061,967 |                |
|-------------------------------------|----------------------------------------|-----------------------------------------|----------------|
|                                     | <b>Percent</b>                         | <b>Percent [95% CI]</b>                 | <b>p-value</b> |
| <b>Triage level</b>                 |                                        |                                         | 0.111          |
| Immediate/Emergent                  | 25.5% [21.3,30.4%]                     | 18.6% [13.9, 24.5%]                     |                |
| Urgent                              | 38.0% [33.3,42.9%]                     | 43.2% [35.9, 50.9%]                     |                |
| Semi-urgent/Non-urgent              | 7.2% [5.2,10.0%]                       | 8.1% [5.4, 12.0%]                       |                |
| No triage                           | 29.2% [23.5,35.7%]                     | 30.1% [21.6, 40.2%]                     |                |
| <b>Diagnostic testing</b>           |                                        |                                         |                |
| BNP                                 | 8.8% [6.8,11.2%]                       | 8.6% [6.2, 11.8%]                       | 0.930          |
| Cardiac enzymes                     | 24.0% [19.3,29.5%]                     | 20.4% [14.8, 27.3%]                     | 0.329          |
| D-Dimer                             | 12.8% [10.5,15.4%]                     | 10.0% [7.0, 14.6%]                      | 0.220          |
| X-ray                               | 75.5% [72.1,78.6%]                     | 75.9% [70.2, 80.8%]                     | 0.908          |
| ECG                                 | 79.6% [76.5,82.4%]                     | 77.2% [71.9, 81.7%]                     | 0.388          |
| Cardiac Monitor                     | 32.8% [28.2,37.7%]                     | 23.9% [18.2, 30.7%]                     | 0.012          |
| CT chest                            | 9.1% [7.3,11.3%]                       | 6.3% [4.4, 9.1%]                        | 0.097          |
| Toxicology screen                   | 6.2% [4.7,8.2%]                        | 9.8% [7.1, 13.4%]                       | 0.037          |
| No testing                          | 23.1% [22.4,80.1%]                     | 20.4% [72.8, 84.6%]                     | 0.497          |
| <b>Seen by consulting physician</b> | 12.2% [9.7,15.3%]                      | 12.3% [8.6, 17.5%]                      | 0.956          |
|                                     | <b>Mean ± SD (sample size)**</b>       | <b>Mean ± SD (sample size)**</b>        | <b>p-value</b> |
| <b>Wait time to see provider</b>    | 34.0 min ± 58.5 (1,010)                | 44.0 min ± 67.8 (469)                   | 0.0365         |

\* Percentages based on national estimates

\*\* Means calculated among those with values > 0 ; estimated number of ED visit for wait times were available: White men: 7,573,251 ; men of color: 3,608,747



**Table S8. Medications administered to young women in ED presenting with chest pain by race\***

|                                                     | <b>White women</b><br>1,514<br>10,578,600 | <b>Women of color</b><br>805<br>6,302,059 |                |
|-----------------------------------------------------|-------------------------------------------|-------------------------------------------|----------------|
|                                                     | <b>Percent</b>                            | <b>Percent</b>                            | <b>p-value</b> |
| <b>Medications prescribed in ED or at discharge</b> | 65.7% [62.1, 69.2%]                       | 68.5% [63.8, 72.9%]                       | 0.312          |
| <b>Anti-platelets</b>                               | 20.9% [17.6, 24.7%]                       | 10.6% [7.7, 14.4%]                        | <0.001         |
| <b>Anti-anginal</b>                                 | 9.1% [6.9, 11.9%]                         | 6.0% [4.0, 9.1%]                          | 0.093          |
| <b>Gastroenterological agents</b>                   | 8.4% [7.0, 10.3%]                         | 7.5% [5.3, 10.6%]                         | 0.549          |
| <b>Narcotic analgesics</b>                          | 18.1% [14.9, 21.8%]                       | 11.5% [8.8, 15.0%]                        | 0.002          |
| <b>Benzodiazepines</b>                              | 10.8% [8.7, 13.3%]                        | 6.3% [4.2, 9.3%]                          | 0.019          |
| <b>NSAIDS</b>                                       | 17.0% [14.7, 19.6%]                       | 18.7% [15.2, 22.7%]                       | 0.459          |

\* Percentages based on national estimates

Note that anticoagulants could not be analyzed due to <30 unweighted records among women and men

**Table S9. Medications administered to young men in ED presenting with chest pain by race\***

|                                                     | <b>White Men</b><br>1,266<br>8,787,519 | <b>Men of color</b><br>567<br>4,061,967 |                |
|-----------------------------------------------------|----------------------------------------|-----------------------------------------|----------------|
|                                                     | <b>Percent</b>                         | <b>Percent</b>                          | <b>p-value</b> |
| <b>Medications prescribed in ED or at discharge</b> | 70.0% [65.5,74.1%]                     | 67.7% [61.1, 73.7]                      | 0.506          |
| <b>Anti-platelets</b>                               | 22.7% [18.6,27.3%]                     | 19.8% [15.7, 24.5%]                     | 0.2939         |
| <b>Anti-anginal</b>                                 | 13.6% [11.0,16.7%]                     | 5.8% [4.1, 8.3%]                        | <0.001         |
| <b>Gastroenterological agents</b>                   | 9.3% [7.1,12.0%]                       | 8.9% [5.6, 13.7%]                       | 0.861          |
| <b>Narcotic analgesics</b>                          | 16.9% [14.3,19.8%]                     | 11.5% [8.6, 15.0%]                      | 0.013          |
| <b>Benzodiazepines</b>                              | 8.3% [6.2,11.0%]                       | -                                       | -              |
| <b>NSAIDS</b>                                       | 70.0% [12.0,17.7%]                     | 20.8% [15.7, 27.0%]                     | 0.038          |

\* Percentages based on national estimates

Note that anticoagulants could not be analyzed due to <30 unweighted records among women and men

**Table S10. Disposition of young women presenting to the Emergency Room with chest pain by race\***

|                                   | <b>White women</b><br>1,514<br>10,578,600 | <b>Women of color</b><br>805<br>6,302,059 |                |
|-----------------------------------|-------------------------------------------|-------------------------------------------|----------------|
|                                   | <b>Percent</b>                            | <b>Percent</b>                            | <b>p-value</b> |
| <b>No follow up</b>               | 4.9% [3.4, 7.1%]                          | 6.7% [3.5,12.4%]                          | 0.4            |
| <b>Return to care</b>             | 75.1% [71.0, 78.9%]                       | 74.0% [66.8,80.1%]                        | 0.770          |
| <b>Transfer to other hospital</b> | -                                         | -                                         | -              |
| <b>Admit</b>                      | 13.2% [10.0, 17.2]                        | 11.1% [8.1,15.2%]                         | 0.452          |
| Admit to observation              | 3.4% [2.4, 4.8%]                          | 4.8% [2.8,8.4%]                           | 0.277          |
| Admitted to hospital              | 9.9% [7.2, 13.5%]                         | 6.8% [4.5,10.0%]                          | 0.138          |
| <b>Other Disposition</b>          | 4.3% [2.8,6.5%]                           | -                                         | -              |
| <b>Unknown</b>                    | -                                         | -                                         | -              |
| <b>Left Early</b>                 | 5.4% [3.5, 8.2%]                          | -                                         | -              |

\*Percentages based on national estimates

**Table S11. Disposition of young men presenting to the Emergency Room with chest pain by race\***

|                                   | <b>White Men</b><br>1,266<br>8,787,519 | <b>Men of color</b><br>567<br>4,061,967 |                |
|-----------------------------------|----------------------------------------|-----------------------------------------|----------------|
|                                   | <b>Percent</b>                         | <b>Percent</b>                          | <b>p-value</b> |
| <b>No follow up</b>               | 6.5% [4.5, 9.3%]                       | 8.6% [5.4, 13.5%]                       | 0.3            |
| <b>Return to care</b>             | 66.3% [62.1, 70.3%]                    | 67.4% [61.0, 73.3%]                     | 0.752          |
| <b>Transfer to other hospital</b> | 2.50% [1.6, 3.9%]                      | -                                       | -              |
| <b>Admit</b>                      | 18.4% [15.6, 21.5%]                    | 16.7% [12.7, 21.8%]                     | 0.503          |
| Admit to observation              | 5.1% [3.3, 7.6%]                       | 6.6% [4.0, 10.6%]                       | 0.332          |
| Admitted to hospital              | 14.3% [11.9, 17.0%]                    | 11.7% [8.8, 15.2%]                      | 0.2077         |
| <b>Other Disposition</b>          | 6.3% [4.6, 8.7%]                       | -                                       | -              |
| <b>Unknown</b>                    | -                                      | -                                       | -              |
| <b>Left Early</b>                 | 7.0% [4.7, 10.2%]                      | -                                       | -              |

\* Percentages based on national estimates

**Table S12. ED diagnoses of all young adults presenting to the ED with chest pain.**

|                                                  | <b>Women</b> | <b>Men</b> |                | <b>White</b> | <b>People of color</b> |                | <b>Total</b> |
|--------------------------------------------------|--------------|------------|----------------|--------------|------------------------|----------------|--------------|
| Sample size                                      | 2,319        | 1,833      | <b>p-value</b> | 2,780        | 1,372                  | <b>p-value</b> |              |
| National estimate                                | 16,880,659   | 12,849,486 |                | 19,366,119   | 10,364,026             |                |              |
| Other chest pain                                 | 40.8%        | 44.0%      | 0.151          | 43.4%        | 40.0%                  | 0.172          | 42.2%        |
| Hypertensive diseases                            | 10.1%        | 13.8%      | 0.011          | 11.5%        | 12.0%                  | 0.747          | 11.7%        |
| Arrhythmia                                       | 3.2%         | 4.9%       | 0.057          | 4.8%         | -                      | -              | 3.9%         |
| Coronary atherosclerosis and other heart disease | 1.9%         | 3.3%       | 0.044          | 2.8%         | -                      | -              | 2.5%         |
| Heart failure & Cardiomyopathy                   | 1.4%         | 1.7%       | 0.611          | 1.4%         | 1.8%                   | 0.544          | 1.6%         |
| Acute myocardial infarction                      | -            | 2.2%       |                | 1.8%         | -                      | -              | 1.4%         |
| Pulmonary heart disease                          | -            | -          |                | -            | -                      | 0.465          | 1.0%         |

**Table S13. Hospital discharge diagnoses of young adults who presented to the ED with chest pain and were admitted to the hospital.**

|                                                  | <b>Women</b> | <b>Men</b> | <b>p-value</b> | <b>White</b> | <b>People of color</b> | <b>p-value</b> | <b>Total</b> |
|--------------------------------------------------|--------------|------------|----------------|--------------|------------------------|----------------|--------------|
| Sample size                                      | 299          | 318        |                | 429          | 188                    |                |              |
| National estimate                                | 2,093,591    | 2,294,069  |                | 3,006,144    | 1,381,517              |                |              |
| Other chest pain                                 | 59.7%        | 55.1%      | 0.495          | 58.8%        | 53.9%                  | 0.36           | 57.3%        |
| Hypertensive diseases                            | 12.5%        | 14.7%      | 0.552          | 15.5%        | -                      | -              | 13.6%        |
| Arrhythmia                                       | -            | -          | -              | -            | -                      | -              | -            |
| Coronary atherosclerosis and other heart disease | -            | -          | -              | -            | -                      | -              | -            |
| Heart failure & Cardiomyopathy                   | -            | -          | -              | -            | -                      | -              | 5.8%         |
| Acute myocardial infarction                      | -            | -          | -              | 7.1%         | -                      | -              | 6.5%         |
| Pulmonary heart disease                          | -            | -          | -              | -            | -                      | -              | -            |
